# Supplementary material for: Fast charge storage kinetics by surface engineering for Ni-rich layered oxide cathodes
Source: Royal Society of Chemistry journal article supplement (doi:10.1039/d3ta00890h), 2023-01-01
Supplement: d3ta00890h1.pdf [file d3ta00890h1.pdf]

## Fast Charge Storage Kinetics by Surface Engineering for Ni-Rich Layered Oxide Cathode

Jiacheng Wang<sup>1,8</sup>, Zhenyu Zhang<sup>6</sup>, Weitao He<sup>1</sup>, Zhixuan Wang<sup>1,3,4</sup>, Suting Weng<sup>4</sup>, Quan Li<sup>7</sup>, Xuefeng Wang<sup>1,4</sup>, Suelen Barg<sup>8,9</sup>, Liquan Chen<sup>1,4</sup>, Hong Li<sup>1-7</sup>, and Fan Wu<sup>1-5\*</sup>

<sup>1</sup> Tianmu Lake Institute of Advanced Energy Storage Technologies, Liyang 213300, Jiangsu, China

<sup>2</sup> Yangtze River Delta Physics Research Center, Liyang 213300, Jiangsu, China

<sup>3</sup> Beijing Advanced Innovation Center for Materials Genome Engineering, Key Laboratory for Renewable Energy, Beijing Key Laboratory for New Energy Materials and Devices, Institute of Physics, Chinese Academy of Sciences, Beijing, 100190, China

<sup>4</sup> School of Physical Sciences, University of Chinese Academy of Sciences, Beijing, 100049, China

<sup>5</sup> Nano Science and Technology Institute, University of Science and Technology of China, Suzhou 215123, China

<sup>6</sup> Beijing WeLion New Energy Technology Co.,LTD, Beijing, 102402, China

<sup>7</sup> Huairou Division, Institute of Physics, Chinese Academy of Sciences, Beijing 101400, China

<sup>8</sup> Henry Royce Institute and Department of Materials, School of Natural Sciences, The University of Manchester, Manchester, M13 9PL, The United Kingdom

<sup>9</sup> Institute of Materials Resource Management (MRM), Augsburg University, Am Technologiezentrum 8, 86159, Augsburg, Germany

\* Corresponding author: Fan Wu: [fwu@iphy.ac.cn](mailto:fwu@iphy.ac.cn)

Table S 1. Element composition of NCM-A2, NCM-S0 and NCM-W3 measured by ICP.

| Sample | Li content (wt.%) | Ni content (wt.%) | Co content (wt.%) | Mn content (wt.%) |
|--------|-------------------|-------------------|-------------------|-------------------|
| NCM-A2 | 7.7271            | 48.4030           | 7.1868            | 2.7350            |
| NCM-S0 | 7.1215            | 49.4750           | 7.4864            | 2.8243            |
| NCM-W3 | 7.0148            | 51.4457           | 7.4276            | 2.8990            |

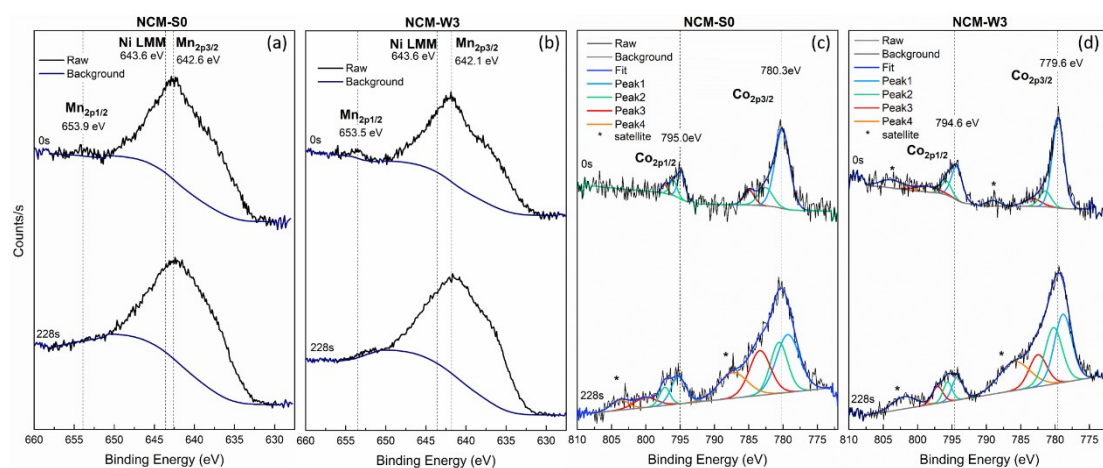

Figure S1. XPS spectra of Mn for NCM-S0 (a) and NCM-W3 (b); XPS spectra of Co for NCM-S0 (c) and NCM-W3 (d).

**Table S1.** XPS spectral features for  $\text{LiNi}_{0.83}\text{Co}_{0.11}\text{Mn}_{0.06}\text{O}_2$  (NCM-S0).

| $\text{LiNi}_{0.83}\text{Co}_{0.11}\text{Mn}_{0.06}\text{O}_2$ (NCM-S0) |                    |                     |                       |                                                                                    |
|-------------------------------------------------------------------------|--------------------|---------------------|-----------------------|------------------------------------------------------------------------------------|
| Etch time (s)                                                           | Element/Transition | Binding Energy (eV) | Concentration (at. %) | Peak Assignment                                                                    |
| 0                                                                       | Li 1s              | 54.78               | 21.76                 | $\text{Li}_2\text{CO}_3$                                                           |
|                                                                         | Co2p3/2            | 780.2               | 0.82                  | Co in $\text{LiNi}_{0.83}\text{Co}_{0.11}\text{Mn}_{0.06}\text{O}_2$               |
|                                                                         | Co2p3/2            | 784.09              | 0.2                   | Satellite                                                                          |
|                                                                         | Ni2p3/2            | 855.1               | 2.83                  | $\text{Ni}^{2+}$ in $\text{LiNi}_{0.83}\text{Co}_{0.11}\text{Mn}_{0.06}\text{O}_2$ |
|                                                                         | Ni2p3/2            | 860.77              | 2.83                  | Satellite                                                                          |
|                                                                         | Ni2p3/2            | 856.32              | 1.08                  | $\text{Ni}^{3+}$ in $\text{LiNi}_{0.83}\text{Co}_{0.11}\text{Mn}_{0.06}\text{O}_2$ |
|                                                                         | Ni2p3/2            | 864.08              | 2.05                  | Satellite                                                                          |
|                                                                         | Ni2p1/2            | 872.76              | 0.41                  | $\text{Ni}^{2+}$ in $\text{LiNi}_{0.83}\text{Co}_{0.11}\text{Mn}_{0.06}\text{O}_2$ |
|                                                                         | Ni2p1/2            | 879.92              | 0.39                  | Satellite                                                                          |
|                                                                         | Ni2p1/2            | 875.65              | 1.27                  | $\text{Ni}^{3+}$ in $\text{LiNi}_{0.83}\text{Co}_{0.11}\text{Mn}_{0.06}\text{O}_2$ |
|                                                                         | Ni2p1/2            | 883.78              | 1.27                  | Satellite                                                                          |
|                                                                         | Mn2p1/2            | 653.79              | 0.23                  | Mn in $\text{LiNi}_{0.83}\text{Co}_{0.11}\text{Mn}_{0.06}\text{O}_2$               |
|                                                                         | C1s                | 284.82              | 16.97                 | Adventitious carbon                                                                |
|                                                                         | C1s                | 289.68              | 5.71                  | $\text{Li}_2\text{CO}_3$                                                           |
|                                                                         | C1s                | 286.68              | 2.05                  | Hydrocarbon                                                                        |
|                                                                         | O1s                | 528.52              | 6.86                  | $\text{Li}_2\text{O}$                                                              |
|                                                                         | O1s                | 531.61              | 26.88                 | $\text{LiOH/Li}_2\text{CO}_3$                                                      |
|                                                                         | O1s                | 529.57              | 6.39                  | O in $\text{LiNi}_{0.83}\text{Co}_{0.11}\text{Mn}_{0.06}\text{O}_2$                |
| 228                                                                     | Li 1s              | 54.45               | 8.56                  | $\text{Li}_2\text{CO}_3$                                                           |
|                                                                         | Li 1s              | 53.66               | 3.66                  | Li in $\text{LiNi}_{0.83}\text{Co}_{0.11}\text{Mn}_{0.06}\text{O}_2$               |

|  |         |        |       |                                                                                               |
|--|---------|--------|-------|-----------------------------------------------------------------------------------------------|
|  | Co2p3/2 | 780.09 | 1.77  | Co in LiNi <sub>0.83</sub> Co <sub>0.11</sub> Mn <sub>0.06</sub> O <sub>2</sub>               |
|  | Co2p3/2 | 784.29 | 1.62  | Satellite                                                                                     |
|  | Ni2p3/2 | 854.33 | 4.33  | Ni <sup>2+</sup> in LiNi <sub>0.83</sub> Co <sub>0.11</sub> Mn <sub>0.06</sub> O <sub>2</sub> |
|  | Ni2p3/2 | 860.84 | 4.33  | Satellite                                                                                     |
|  | Ni2p3/2 | 855.85 | 1.17  | Ni <sup>3+</sup> in LiNi <sub>0.83</sub> Co <sub>0.11</sub> Mn <sub>0.06</sub> O <sub>2</sub> |
|  | Ni2p3/2 | 862.44 | 2.15  | Satellite                                                                                     |
|  | Ni2p1/2 | 872.06 | 2.87  | Ni <sup>2+</sup> in LiNi <sub>0.83</sub> Co <sub>0.11</sub> Mn <sub>0.06</sub> O <sub>2</sub> |
|  | Ni2p1/2 | 879.04 | 1.43  | Satellite                                                                                     |
|  | Ni2p1/2 | 874.64 | 4.99  | Ni <sup>3+</sup> in LiNi <sub>0.83</sub> Co <sub>0.11</sub> Mn <sub>0.06</sub> O <sub>2</sub> |
|  | Ni2p1/2 | 881.57 | 5     | Satellite                                                                                     |
|  | Mn2p1/2 | 652.7  | 0.09  | Mn in LiNi <sub>0.83</sub> Co <sub>0.11</sub> Mn <sub>0.06</sub> O <sub>2</sub>               |
|  | C1s     | 284.8  | 19.5  | Adventitious carbon                                                                           |
|  | C1s     | 289.18 | 3.61  | Li <sub>2</sub> CO <sub>3</sub>                                                               |
|  | O1s     | 528.08 | 5.32  | Li <sub>2</sub> O                                                                             |
|  | O1s     | 531.64 | 15.61 | LiOH/Li <sub>2</sub> CO <sub>3</sub>                                                          |
|  | O1s     | 529.74 | 13.98 | O in LiNi <sub>0.83</sub> Co <sub>0.11</sub> Mn <sub>0.06</sub> O <sub>2</sub>                |

**Table S2.** XPS spectral features for LiNi<sub>0.83</sub>Co<sub>0.11</sub>Mn<sub>0.06</sub>O<sub>2</sub> (NCM-W3).

| LiNi <sub>0.83</sub> Co <sub>0.11</sub> Mn <sub>0.06</sub> O <sub>2</sub> (NCM-W3) |                     |                     |                                                                                |                                                                                               |
|------------------------------------------------------------------------------------|---------------------|---------------------|--------------------------------------------------------------------------------|-----------------------------------------------------------------------------------------------|
| Etch time (s)                                                                      | Element/ Transition | Binding Energy (eV) | Concentration (at. %)                                                          | Peak Assignment                                                                               |
| 0                                                                                  | Li 1s               | 53.34               | 8.31                                                                           | Li in LiNi <sub>0.83</sub> Co <sub>0.11</sub> Mn <sub>0.06</sub> O <sub>2</sub>               |
|                                                                                    | Li 1s               | 54.8                | 4.33                                                                           | Li <sub>2</sub> CO <sub>3</sub>                                                               |
|                                                                                    | Co2p3/2             | 779.68              | 1.2                                                                            | Co in LiNi <sub>0.83</sub> Co <sub>0.11</sub> Mn <sub>0.06</sub> O <sub>2</sub>               |
|                                                                                    | Co2p3/2             | 788.95              | 0.04                                                                           | Satellite                                                                                     |
|                                                                                    | Ni2p3/2             | 854.2               | 2.41                                                                           | Ni <sup>2+</sup> in LiNi <sub>0.83</sub> Co <sub>0.11</sub> Mn <sub>0.06</sub> O <sub>2</sub> |
|                                                                                    | Ni2p3/2             | 860.47              | 1.68                                                                           | Satellite                                                                                     |
|                                                                                    | Ni2p3/2             | 855.42              | 2.69                                                                           | Ni <sup>3+</sup> in LiNi <sub>0.83</sub> Co <sub>0.11</sub> Mn <sub>0.06</sub> O <sub>2</sub> |
|                                                                                    | Ni2p3/2             | 863.69              | 0.34                                                                           | Satellite                                                                                     |
|                                                                                    | Ni2p1/2             | 871.7               | 2.41                                                                           | Ni <sup>2+</sup> in LiNi <sub>0.83</sub> Co <sub>0.11</sub> Mn <sub>0.06</sub> O <sub>2</sub> |
|                                                                                    | Ni2p1/2             | 877.82              | 1.73                                                                           | Satellite                                                                                     |
|                                                                                    | Ni2p1/2             | 873.28              | 2.69                                                                           | Ni <sup>3+</sup> in LiNi <sub>0.83</sub> Co <sub>0.11</sub> Mn <sub>0.06</sub> O <sub>2</sub> |
|                                                                                    | Ni2p1/2             | 880.71              | 3.14                                                                           | Satellite                                                                                     |
|                                                                                    | Mn2p1/2             | 653.5               | 0.37                                                                           | Mn in LiNi <sub>0.83</sub> Co <sub>0.11</sub> Mn <sub>0.06</sub> O <sub>2</sub>               |
|                                                                                    | C1s                 | 284.79              | 20.49                                                                          | Adventitious carbon                                                                           |
|                                                                                    | C1s                 | 289.47              | 2.74                                                                           | Li <sub>2</sub> CO <sub>3</sub>                                                               |
|                                                                                    | C1s                 | 285.48              | 5                                                                              | Hydrocarbon                                                                                   |
| O1s                                                                                | 531.65              | 20.91               | LiOH/Li <sub>2</sub> CO <sub>3</sub>                                           |                                                                                               |
| O1s                                                                                | 528.78              | 19.53               | O in LiNi <sub>0.83</sub> Co <sub>0.11</sub> Mn <sub>0.06</sub> O <sub>2</sub> |                                                                                               |
| 228                                                                                | Li 1s               | 53.26               | 6.11                                                                           | Li in LiNi <sub>0.83</sub> Co <sub>0.11</sub> Mn <sub>0.06</sub> O <sub>2</sub>               |
|                                                                                    | Li 1s               | 54.73               | 2.53                                                                           | Li <sub>2</sub> CO <sub>3</sub>                                                               |
|                                                                                    | Co2p3/2             | 779.46              | 2.03                                                                           | Co in LiNi <sub>0.83</sub> Co <sub>0.11</sub> Mn <sub>0.06</sub> O <sub>2</sub>               |

|  |         |        |       |                                                                                               |
|--|---------|--------|-------|-----------------------------------------------------------------------------------------------|
|  | Co2p3/2 | 783.03 | 2.27  | Satellite                                                                                     |
|  | Ni2p3/2 | 853.33 | 4.38  | Ni <sup>2+</sup> in LiNi <sub>0.83</sub> Co <sub>0.11</sub> Mn <sub>0.06</sub> O <sub>2</sub> |
|  | Ni2p3/2 | 860.41 | 6.97  | Satellite                                                                                     |
|  | Ni2p3/2 | 855    | 7.24  | Ni <sup>3+</sup> in LiNi <sub>0.83</sub> Co <sub>0.11</sub> Mn <sub>0.06</sub> O <sub>2</sub> |
|  | Ni2p3/2 | 865.29 | 1.27  | Satellite                                                                                     |
|  | Ni2p1/2 | 870.99 | 4.39  | Ni <sup>2+</sup> in LiNi <sub>0.83</sub> Co <sub>0.11</sub> Mn <sub>0.06</sub> O <sub>2</sub> |
|  | Ni2p1/2 | 877.1  | 2.95  | Satellite                                                                                     |
|  | Ni2p1/2 | 872.91 | 7.24  | Ni <sup>3+</sup> in LiNi <sub>0.83</sub> Co <sub>0.11</sub> Mn <sub>0.06</sub> O <sub>2</sub> |
|  | Ni2p1/2 | 880.09 | 6     | Satellite                                                                                     |
|  | Mn2p1/2 | 653.04 | 0.17  | Mn in LiNi <sub>0.83</sub> Co <sub>0.11</sub> Mn <sub>0.06</sub> O <sub>2</sub>               |
|  | C1s     | 284.8  | 8.21  | Adventitious carbon                                                                           |
|  | C1s     | 288.97 | 2.57  | Li <sub>2</sub> CO <sub>3</sub>                                                               |
|  | O1s     | 531.05 | 12.55 | LiOH/Li <sub>2</sub> CO <sub>3</sub>                                                          |
|  | O1s     | 528.71 | 23.1  | O in LiNi <sub>0.83</sub> Co <sub>0.11</sub> Mn <sub>0.06</sub> O <sub>2</sub>                |

**Table S3.** Proportions of different species in LiNi<sub>0.83</sub>Co<sub>0.11</sub>Mn<sub>0.06</sub>O<sub>2</sub> (NCM-S0) measured by XPS.

|               | LiNi <sub>0.83</sub> Co <sub>0.11</sub> Mn <sub>0.06</sub> O <sub>2</sub> (NCM-S0) species proportion (%) |                  |      |      |                   |                                 |          |
|---------------|-----------------------------------------------------------------------------------------------------------|------------------|------|------|-------------------|---------------------------------|----------|
| Etch time (s) | Ni <sup>2+</sup>                                                                                          | Ni <sup>3+</sup> | Co   | Mn   | Li <sub>2</sub> O | Li <sub>2</sub> CO <sub>3</sub> | Ni/Co/Mn |
| 0             | 11.37                                                                                                     | 5.10             | 3.15 | 0.64 | 43.51             | 36.22                           | 81/16/3  |
| 228           | 15.92                                                                                                     | 18.36            | 9.48 | 0.15 | 33.39             | 22.70                           | 78/22/0  |

**Table S4.** Proportions of different species in LiNi<sub>0.83</sub>Co<sub>0.11</sub>Mn<sub>0.06</sub>O<sub>2</sub> (NCM-W3) measured by XPS.

|               | LiNi <sub>0.83</sub> Co <sub>0.11</sub> Mn <sub>0.06</sub> O <sub>2</sub> (NCM-W3) species proportion (%) |                  |       |      |                                 |          |
|---------------|-----------------------------------------------------------------------------------------------------------|------------------|-------|------|---------------------------------|----------|
| Etch time (s) | Ni <sup>2+</sup>                                                                                          | Ni <sup>3+</sup> | Co    | Mn   | Li <sub>2</sub> CO <sub>3</sub> | Ni/Co/Mn |
| 0             | 29.65                                                                                                     | 33.09            | 11.47 | 3.87 | 21.91                           | 80/15/5  |
| 228           | 24.98                                                                                                     | 41.30            | 14.93 | 0.59 | 18.20                           | 81/18/1  |
